# Supplementary material
Source: PubMed Central journal article supplement (PMC4376629)
Supplement: NIHMS661625-supplement-2.pdf [file NIHMS661625-supplement-2.pdf]

**Supplemental Material**

**Endothelial PPAR $\gamma$  Protects Against Vascular Thrombosis**

**by Downregulating P-Selectin Expression**

Hong Jin, Milena A. Gebaska, Ilya O. Blokhin, Katina M. Wilson, Pimonrat Ketsawatsomkron, Anil

K. Chauhan, Henry L. Keen, Curt D. Sigmund, and Steven R. Lentz

**Supplemental Table I. Expression of NF- $\kappa$ B target genes in endothelial cells from E-V290M and non-Tg mice.**

| Gene*          | Probe        | Fold Change | P-Value | Description                                          |
|----------------|--------------|-------------|---------|------------------------------------------------------|
| <i>Selp</i>    | 1420558_at   | 6.90        | 0.0061  | selectin, platelet                                   |
| <i>Cxcl5</i>   | 1419728_at   | 6.61        | 0.0120  | chemokine (C-X-C motif) ligand 5                     |
| <i>Il1rn</i>   | 1425663_at   | 5.04        | 0.0755  | interleukin 1 receptor antagonist                    |
| <i>Il6</i>     | 1450297_at   | 4.23        | 0.0691  | interleukin 6                                        |
| <i>Tfpi2</i>   | 1418547_at   | 3.80        | 0.0201  | tissue factor pathway inhibitor 2                    |
| <i>Cd80</i>    | 1427717_at   | 3.53        | 0.0376  | CD80 antigen                                         |
| <i>Ptgs2</i>   | 1417262_at   | 2.96        | 0.1132  | prostaglandin-endoperoxide synthase 2                |
| <i>Ier3</i>    | 1419647_a_at | 2.43        | 0.0111  | immediate early response 3                           |
| <i>Ccl2</i>    | 1420380_at   | 2.37        | 0.0378  | chemokine (C-C motif) ligand 2                       |
| <i>Tnc</i>     | 1416342_at   | 2.19        | 0.0528  | tenascin C                                           |
| <i>Cd44</i>    | 1434376_at   | 2.07        | 0.0446  | CD44 antigen                                         |
| <i>Ptx3</i>    | 1418666_at   | 1.86        | 0.0864  | pentraxin related gene                               |
| <i>Il11</i>    | 1449982_at   | 1.82        | 0.0225  | interleukin 11                                       |
| <i>Ccl5</i>    | 1418126_at   | 1.77        | 0.0265  | chemokine (C-C motif) ligand 5                       |
| <i>Tgm2</i>    | 1433428_x_at | 1.76        | 0.0019  | transglutaminase 2, C polypeptide                    |
| <i>Bcl2l1</i>  | 1420887_a_at | 1.64        | 0.0161  | Bcl2-like 1                                          |
| <i>Ccnd1</i>   | 1448698_at   | 1.61        | 0.0846  | cyclin D1                                            |
| <i>Bdkrb1</i>  | 1450586_at   | 1.55        | 0.0299  | bradykinin receptor, beta 1                          |
| <i>Tnfrsf9</i> | 1460469_at   | 1.55        | 0.0507  | tumor necrosis factor receptor superfamily, member 9 |
| <i>Cd83</i>    | 1416111_at   | 1.53        | 0.0186  | CD83 antigen                                         |
| <i>Csf1</i>    | 1448914_a_at | 1.53        | 0.0208  | colony stimulating factor 1 (macrophage)             |
| <i>Bcl3</i>    | 1418133_at   | 1.49        | 0.0285  | B-cell leukemia/lymphoma 3                           |

|                |              |      |        |                                                             |
|----------------|--------------|------|--------|-------------------------------------------------------------|
| <i>Nfkb2</i>   | 1425902_a_at | 1.48 | 0.0767 | nuclear factor NF-kappa-B p100 subunit                      |
| <i>Csf3</i>    | 1419427_at   | 1.44 | 0.1416 | colony stimulating factor 3 (granulocyte)                   |
| <i>Csf2</i>    | 1427429_at   | 1.39 | 0.1081 | colony stimulating factor 2 (granulocyte-macrophage)        |
| <i>Crp</i>     | 1421946_at   | 1.38 | 0.0383 | C-reactive protein, pentraxin-related                       |
| <i>Ptafr</i>   | 1427871_at   | 1.28 | 0.0314 | platelet-activating factor receptor                         |
| <i>Pdgfb</i>   | 1450413_at   | 1.27 | 0.0188 | platelet derived growth factor, B polypeptide               |
| <i>Sele</i>    | 1421712_at   | 1.25 | 0.1743 | selectin, endothelial cell                                  |
| <i>Tap1</i>    | 1448177_at   | 1.25 | 0.0722 | transporter 1, ATP-binding cassette, sub-family B (MDR/TAP) |
| <i>Il1b</i>    | 1449399_a_at | 1.24 | 0.0386 | interleukin 1 beta                                          |
| <i>Cd74</i>    | 1425519_a_at | 1.23 | 0.0380 | CD74 antigen                                                |
| <i>Hmox1</i>   | 1448239_at   | 1.23 | 0.2046 | heme oxygenase (decycling) 1                                |
| <i>Icam1</i>   | 1424067_at   | 1.22 | 0.1967 | intercellular adhesion molecule                             |
| <i>Nr4a2</i>   | 1455034_at   | 1.22 | 0.2101 | Nuclear receptor subfamily 4, group A, member 2             |
| <i>Il9</i>     | 1450565_at   | 1.21 | 0.1117 | interleukin 9                                               |
| <i>Ifnb1</i>   | 1422305_at   | 1.19 | 0.2352 | interferon beta 1, fibroblast                               |
| <i>Il1a</i>    | 1421473_at   | 1.19 | 0.1828 | interleukin 1 alpha                                         |
| <i>Blr1</i>    | 1422003_at   | 1.17 | 0.2265 | Burkitt lymphoma receptor 1                                 |
| <i>Mmp9</i>    | 1448291_at   | 1.17 | 0.1559 | matrix metalloproteinase 9                                  |
| <i>Alox12b</i> | 1418266_at   | 1.15 | 0.2218 | arachidonate 12-lipoxygenase, 12R type                      |
| <i>Ccr5</i>    | 1422260_x_at | 1.15 | 0.1298 | chemokine (C-C motif) receptor 5                            |
| <i>Ltb</i>     | 1419135_at   | 1.15 | 0.2059 | lymphotoxin B                                               |
| <i>Slc2a5</i>  | 1416639_at   | 1.13 | 0.1748 | glucose transporter type 5                                  |
| <i>Cd3g</i>    | 1419178_at   | 1.11 | 0.3848 | CD3 antigen, gamma polypeptide                              |
| <i>Il2ra</i>   | 1420692_at   | 1.11 | 0.3149 | interleukin 2 receptor, alpha chain                         |
| <i>Nfkb1</i>   | 1442949_at   | 1.11 | 0.2393 | nuclear factor NF-kappa-B p105 subunit                      |

|               |              |      |        |                                                                 |
|---------------|--------------|------|--------|-----------------------------------------------------------------|
| <i>Gstp1</i>  | 1449575_a_at | 1.10 | 0.2363 | glutathione S-transferase, pi 1                                 |
| <i>Nqo1</i>   | 1423627_at   | 1.10 | 0.4868 | NAD(P)H dehydrogenase, quinone 1                                |
| <i>Lta</i>    | 1420353_at   | 1.09 | 0.5470 | lymphotoxin A                                                   |
| <i>Oprm1</i>  | 1441791_at   | 1.09 | 0.3484 | Opioid receptor, mu 1                                           |
| <i>Tacr1</i>  | 1422282_at   | 1.08 | 0.4854 | tachykinin receptor 1                                           |
| <i>Vim</i>    | 1450641_at   | 1.08 | 0.4246 | vimentin                                                        |
| <i>Ccr7</i>   | 1423466_at   | 1.07 | 0.5211 | chemokine (C-C motif) receptor 7                                |
| <i>Tnf</i>    | 1419607_at   | 1.06 | 0.5392 | tumor necrosis factor                                           |
| <i>Il13</i>   | 1420802_at   | 1.05 | 0.6351 | interleukin 13                                                  |
| <i>S100a6</i> | 1421375_a_at | 1.05 | 0.5286 | S100 calcium binding protein A6<br>(calcyclin)                  |
| <i>Scnn1a</i> | 1425088_at   | 1.03 | 0.7692 | sodium channel, nonvoltage-gated, type<br>I, alpha              |
| <i>Cd69</i>   | 1428735_at   | 1.02 | 0.8946 | CD69 antigen                                                    |
| <i>Cr2</i>    | 1425289_a_at | 1.01 | 0.9379 | complement receptor 2                                           |
| <i>Irf7</i>   | 1417244_a_at | 1.00 | 0.9880 | interferon regulatory factor 7                                  |
| <i>Relb</i>   | 1417856_at   | 0.99 | 0.9599 | avian reticuloendotheliosis viral (v-rel)<br>oncogene related B |
| <i>Cd48</i>   | 1427301_at   | 0.98 | 0.8533 | CD48 antigen                                                    |
| <i>F3</i>     | 1417408_at   | 0.95 | 0.6423 | coagulation factor III                                          |
| <i>Plcd1</i>  | 1416675_s_at | 0.93 | 0.6940 | phospholipase C, delta 1                                        |
| <i>Ager</i>   | 1420428_at   | 0.91 | 0.4683 | advanced glycosylation end product-<br>specific receptor        |
| <i>Elf3</i>   | 1416916_at   | 0.91 | 0.3489 | E74-like factor 3                                               |
| <i>Vcam1</i>  | 1451314_a_at | 0.88 | 0.3016 | vascular cell adhesion molecule 1                               |
| <i>Myc</i>    | 1424942_a_at | 0.85 | 0.3375 | myelocytomatosis oncogene                                       |
| <i>Defb4</i>  | 1419600_at   | 0.83 | 0.5444 | defensin beta 4                                                 |
| <i>Plau</i>   | 1422139_at   | 0.82 | 0.6317 | plasminogen activator, urokinase                                |
| <i>Il15</i>   | 1418219_at   | 0.80 | 0.1906 | interleukin 15                                                  |

|                |              |      |        |                                                |
|----------------|--------------|------|--------|------------------------------------------------|
| <i>Irf1</i>    | 1448436_a_at | 0.79 | 0.2772 | interferon regulatory factor 1                 |
| <i>Tpmt</i>    | 1438087_at   | 0.79 | 0.2607 | thiopurine methyltransferase                   |
| <i>Sod2</i>    | 1442994_at   | 0.76 | 0.0908 | Superoxide dismutase 2, mitochondrial          |
| <i>Tnfaip3</i> | 1433699_at   | 0.75 | 0.1912 | tumor necrosis factor, alpha-induced protein 3 |
| <i>Ccl11</i>   | 1417789_at   | 0.72 | 0.2840 | small chemokine (C-C motif) ligand 11          |
| <i>Il15ra</i>  | 1448681_at   | 0.69 | 0.0622 | interleukin 15 receptor, alpha chain           |
| <i>Nfkb1a</i>  | 1448306_at   | 0.65 | 0.0402 | I-kappa-B-alpha                                |
| <i>Irf2</i>    | 1447527_at   | 0.61 | 0.0234 | Interferon regulatory factor 2                 |
| <i>Stat5a</i>  | 1420178_at   | 0.53 | 0.0138 | Transcribed locus                              |
| <i>Bcl2</i>    | 1440770_at   | 0.50 | 0.0008 | B-cell leukemia/lymphoma 2                     |
| <i>Apoc3</i>   | 1418278_at   | 0.38 | 0.2090 | apolipoprotein C-III                           |
| <i>Irf4</i>    | 1421173_at   | 0.30 | 0.0162 | interferon regulatory factor 4                 |

\*Gene: Official gene symbol from NCBI; Probe: probe set from Affymetrix MOE430 array; Change: fold change relative to non-transgenic littermates. For genes with multiple probe sets, the probe set with the lowest p-value is presented. Data are from an existing microarray dataset (available from NCBI-GEO at accession GSE11870).

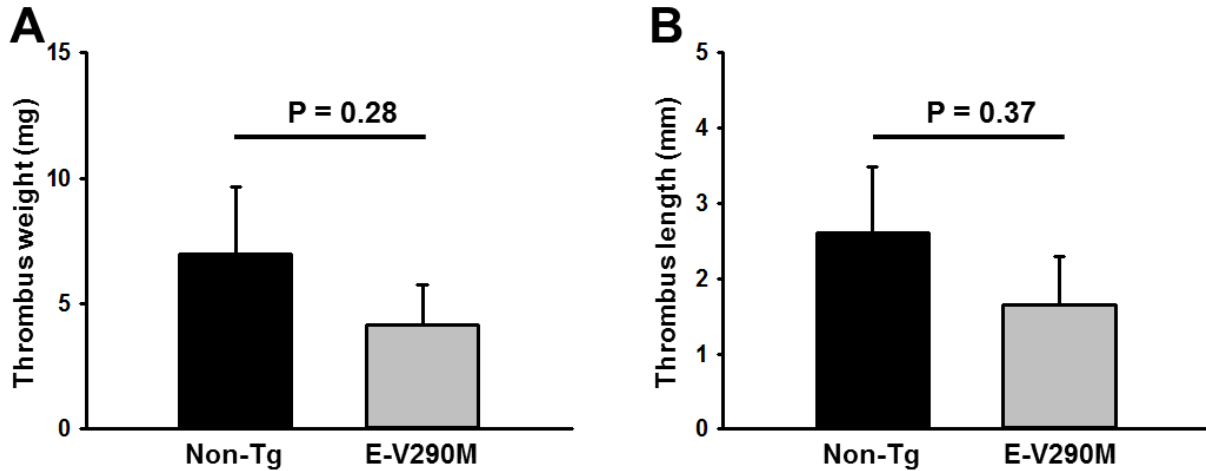

**Supplemental Figure I. Inferior vena cava (IVC) thrombosis.** Venous thrombosis was induced in male non-transgenic (non-Tg) (N = 7) or E-V290M mice (N = 12) mice by IVC ligation, and the weight (A) and length (B) of thrombi was measured after 48 hours. Values are mean  $\pm$  SE. The P-values were determined using the rank sum test.

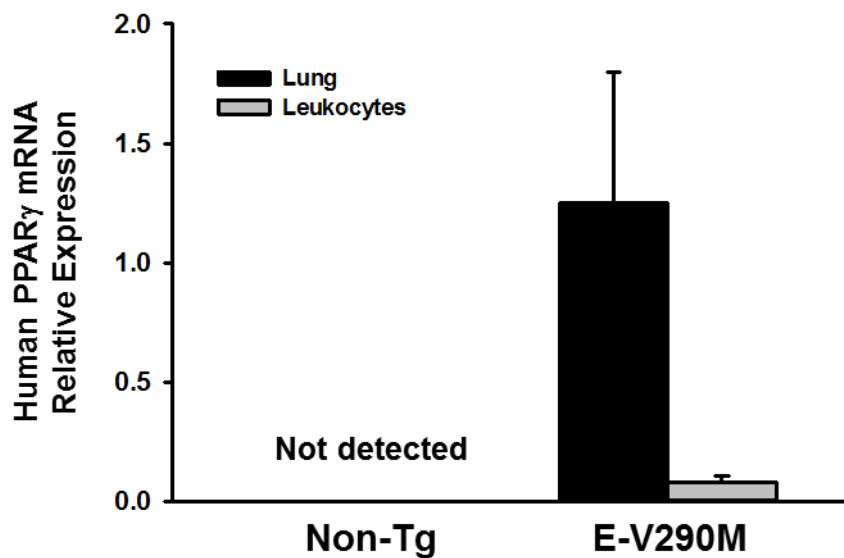

**Supplemental Figure II. Expression of human PPAR $\gamma$  transgene mRNA.** Levels of human PPAR $\gamma$  mRNA in lung and peripheral blood leukocytes from non-Tg or E-V290M mice were measured by qPCR (N = 4).

**Supplemental Movie 1. Representative video of leukocyte rolling in non-Tg mice.**

Leukocyte rolling on an unstimulated mesenteric vein of a male non-Tg mouse was visualized in real time using phase contrast video microscopy.

**Supplemental Movie 2. Representative video of leukocyte rolling in E-V290M mice.**

Leukocyte rolling on an unstimulated mesenteric vein of a male E-V290M mouse was visualized in real time using phase contrast video microscopy.

**Supplemental Movie 3. Representative video of leukocyte rolling in E-V290M mice after administration of anti-P-selectin antibody.** Leukocyte rolling on an unstimulated mesenteric vein of a male E-V290M mouse was visualized in real time using phase contrast video microscopy after pre-treatment with a P-selectin blocking antibody.
